# Supplementary material for: Systematic review of methods used to assess exposure to pesticides in occupational epidemiology studies, 1993–2017
Source: PubMed Central journal article supplement — Occup Environ Med. 2020 Feb 25;77(6):357–67. doi: 10.1136/oemed-2019-105880 (PMC7279185; doi:10.1136/oemed-2019-105880), 2020-02-25
Supplement: oemed-2019-105880supp001.pdf [file oemed-2019-105880supp001.pdf]

|                                                                                                                                                                                                                                                                                         |                                                                                                                                                                                                                                                                                                                                                                                                                                                                                                                                                |
|-----------------------------------------------------------------------------------------------------------------------------------------------------------------------------------------------------------------------------------------------------------------------------------------|------------------------------------------------------------------------------------------------------------------------------------------------------------------------------------------------------------------------------------------------------------------------------------------------------------------------------------------------------------------------------------------------------------------------------------------------------------------------------------------------------------------------------------------------|
| <b>Supplementary File 1.</b> Search terms used in Embase to target epidemiological articles on occupational exposure to pesticides in relation to all outcomes published 1993-2017. For searches in Medline the same search terms were used using database-specific syntax for Medline. |                                                                                                                                                                                                                                                                                                                                                                                                                                                                                                                                                |
|                                                                                                                                                                                                                                                                                         |                                                                                                                                                                                                                                                                                                                                                                                                                                                                                                                                                |
|                                                                                                                                                                                                                                                                                         |                                                                                                                                                                                                                                                                                                                                                                                                                                                                                                                                                |
|                                                                                                                                                                                                                                                                                         | <b>PESTICIDES</b>                                                                                                                                                                                                                                                                                                                                                                                                                                                                                                                              |
| EMTREE                                                                                                                                                                                                                                                                                  |                                                                                                                                                                                                                                                                                                                                                                                                                                                                                                                                                |
| #1                                                                                                                                                                                                                                                                                      | 'pesticide'/exp                                                                                                                                                                                                                                                                                                                                                                                                                                                                                                                                |
| Keywords and synonyms                                                                                                                                                                                                                                                                   |                                                                                                                                                                                                                                                                                                                                                                                                                                                                                                                                                |
| #2                                                                                                                                                                                                                                                                                      | pesticide*:ti,ab OR fungicid*:ti,ab OR herbicid*:ti,ab OR chemosterilant*:ti,ab OR acaricide*:ti,ab OR ('crop protection' NEAR/15 agent):ti,ab OR defoliant*:ti,ab OR (animal NEAR/15 treatment):ti,ab OR rodenticide*:ti,ab OR molluscacide*:ti,ab OR insecticide*:ti,ab OR ((insect* OR bug OR vector) NEAR/15 (repellent* OR spray*)):ti,ab                                                                                                                                                                                                 |
| #3                                                                                                                                                                                                                                                                                      | #1 OR #2                                                                                                                                                                                                                                                                                                                                                                                                                                                                                                                                       |
|                                                                                                                                                                                                                                                                                         |                                                                                                                                                                                                                                                                                                                                                                                                                                                                                                                                                |
|                                                                                                                                                                                                                                                                                         | <b>TYPES OF EXPOSURES</b>                                                                                                                                                                                                                                                                                                                                                                                                                                                                                                                      |
| EMTREE                                                                                                                                                                                                                                                                                  |                                                                                                                                                                                                                                                                                                                                                                                                                                                                                                                                                |
| #4                                                                                                                                                                                                                                                                                      | ('dietary exposure'/exp OR 'environmental monitoring'/exp OR 'inhalation exposure'/exp OR 'maternal exposure'/exp OR 'occupational exposure'/exp OR 'paternal exposure'/exp) NOT 'biological oxygen demand analyses'/exp NOT 'water quality'/exp NOT 'maximum allowable concentration'/exp NOT 'radiation exposure'/exp NOT 'war exposure'/exp NOT 'cold exposure' NOT 'dust exposure'/exp NOT 'exposure to violence'/exp NOT 'perinatal drug exposure'/exp NOT 'prenatal drug exposure'/exp NOT 'sun exposure'/exp NOT 'thermal exposure'/exp |
| Keywords and synonyms                                                                                                                                                                                                                                                                   | (based on the above Emtree-structure)                                                                                                                                                                                                                                                                                                                                                                                                                                                                                                          |
| #5                                                                                                                                                                                                                                                                                      | ((diet* OR nutrition OR food) NEAR/15 (exposure OR intake* OR ingest*)):ti,ab                                                                                                                                                                                                                                                                                                                                                                                                                                                                  |
| #6                                                                                                                                                                                                                                                                                      | (environment* NEAR/15 (monitor* OR surveil*)):ti,ab                                                                                                                                                                                                                                                                                                                                                                                                                                                                                            |
| #7                                                                                                                                                                                                                                                                                      | ((inhal* OR inspirat*) NEAR/15 exposure):ti,ab                                                                                                                                                                                                                                                                                                                                                                                                                                                                                                 |
| #8                                                                                                                                                                                                                                                                                      | ((matern* OR pregnan* OR mother*) NEAR/15 exposure):ti,ab                                                                                                                                                                                                                                                                                                                                                                                                                                                                                      |
| #9                                                                                                                                                                                                                                                                                      | ((occupation* OR work* OR job* OR employ* OR factory OR plant* OR industr* OR agricult*) NEAR/15 exposure):ti,ab                                                                                                                                                                                                                                                                                                                                                                                                                               |
| #10                                                                                                                                                                                                                                                                                     | ((patern* OR father*) NEAR/15 exposure):ti,ab                                                                                                                                                                                                                                                                                                                                                                                                                                                                                                  |
| #11                                                                                                                                                                                                                                                                                     | ((dermal* OR skin* OR cutan* OR percutan* OR mucosal OR throat OR nasal OR eye) NEAR/15 exposure):ti,ab                                                                                                                                                                                                                                                                                                                                                                                                                                        |
| #12                                                                                                                                                                                                                                                                                     | #4 OR #5 OR #6 OR #7 OR #8 OR #9 OR #10 OR #11                                                                                                                                                                                                                                                                                                                                                                                                                                                                                                 |
|                                                                                                                                                                                                                                                                                         |                                                                                                                                                                                                                                                                                                                                                                                                                                                                                                                                                |
|                                                                                                                                                                                                                                                                                         | <b>WORK TASKS AND POTENTIALLY EXPOSED PROFESSIONS</b>                                                                                                                                                                                                                                                                                                                                                                                                                                                                                          |
| Keywords                                                                                                                                                                                                                                                                                |                                                                                                                                                                                                                                                                                                                                                                                                                                                                                                                                                |
| #13                                                                                                                                                                                                                                                                                     | ((work* OR job* OR employ*) NEAR/15 (horticulture OR orchard* OR vineyard* OR pest* OR garden* OR greenhouse* OR flower* OR veterinar* OR firefighter* OR forest* OR crop* OR animal* OR livestock OR nurs* OR farm* OR field* OR factor* OR plant* OR industr* OR agricult* OR field OR soil OR municipal* OR 'wood preservation')):ti,ab OR (garden* OR veterinar* OR farmer* OR                                                                                                                                                             |

|     |                                                                                                                                                                                                         |
|-----|---------------------------------------------------------------------------------------------------------------------------------------------------------------------------------------------------------|
|     | applicator* OR handler* OR 're-ent*' OR 're ent*' OR mixer* OR loader* OR formulator* OR irrigator* OR exterminator* OR spray* OR flower):ti,ab                                                         |
| #14 | #12 OR #13                                                                                                                                                                                              |
| #15 | #3 AND #14 AND ([danish]/lim OR [dutch]/lim OR [english]/lim OR [french]/lim OR [german]/lim OR [norwegian]/lim OR [spanish]/lim OR [swedish]/lim) AND [humans]/lim AND [1-1-1993]/sd NOT [1-1-2018]/sd |
