# Supplementary material for: Systematic review of methods used to assess exposure to pesticides in occupational epidemiology studies, 1993–2017
Source: PubMed Central journal article supplement — Occup Environ Med. 2020 Feb 25;77(6):357–67. doi: 10.1136/oemed-2019-105880 (PMC7279185; doi:10.1136/oemed-2019-105880), 2020-02-25
Supplement: oemed-2019-105880supp003.pdf [file oemed-2019-105880supp003.pdf]

| <b>Supplementary File 3.</b> Relative frequencies of outcome classifications according to study location extracted from articles on occupational pesticide exposures and various health outcomes. |     |      |      |      |      |      |      |      |      |      |      |      |                             |      |
|---------------------------------------------------------------------------------------------------------------------------------------------------------------------------------------------------|-----|------|------|------|------|------|------|------|------|------|------|------|-----------------------------|------|
| Study location <sup>i</sup>                                                                                                                                                                       | LIC |      | LMIC |      | UMIC |      | HIC  |      | SHIC |      | AHIC |      | Study location not reported |      |
|                                                                                                                                                                                                   | n   | %    | n    | %    | n    | %    | n    | %    | n    | %    | n    | %    | n                           | %    |
| Number of articles                                                                                                                                                                                | 16  | 1.3  | 134  | 10.5 | 204  | 16.1 | 841  | 66.2 | 13   | 1.0  | 30   | 2.4  | 33                          | 2.6  |
| Articles applying >1 EAM                                                                                                                                                                          | 1   | 6.3  | 11   | 8.2  | 19   | 9.4  | 159  | 18.9 | 1    | 7.6  | 5    | 16.7 | 7                           | 21.2 |
| Articles not reporting EAM                                                                                                                                                                        | 1   | 6.2  | 1    | 2.2  | 4    | 0.2  | 2    | 0.2  | 1    | 7.7  | .    | .    | .                           | .    |
| Number of EAM occurrences in studies                                                                                                                                                              | 17  | 1.1  | 145  | 9.8  | 222  | 15.0 | 1007 | 67.9 | 16   | 1.1  | 36   | 2.4  | 40                          | 2.7  |
| Self-reported health outcomes                                                                                                                                                                     | 12  | 70.6 | 27   | 18.6 | 37   | 16.7 | 119  | 11.8 | 3    | 18.8 | 2    | 5.6  | 5                           | 12.5 |
| Cancer                                                                                                                                                                                            | .   | .    | 11   | 7.6  | 21   | 9.5  | 342  | 34.0 | 4    | 25.0 | 13   | 36.1 | 3                           | 7.5  |
| Genetic biomarkers <sup>ii</sup>                                                                                                                                                                  | 1   | 5.9  | 27   | 18.6 | 60   | 27.0 | 80   | 7.9  | 1    | 6.2  | 1    | 2.8  | 14                          | 35.0 |
| Neurological:                                                                                                                                                                                     |     |      |      |      |      |      |      |      |      |      |      |      |                             |      |
| Doctor diagnosed                                                                                                                                                                                  | .   | .    | 4    | 2.8  | 3    | 1.4  | 78   | 7.7  | 4    | 25.0 | 4    | 11.1 | 1                           | 2.5  |
| Test result <sup>ii</sup>                                                                                                                                                                         | 2   | 11.8 | 16   | 11.0 | 9    | 4.1  | 45   | 4.5  | .    | .    | .    | .    | 5                           | 12.5 |
| Reproductive + offspring:                                                                                                                                                                         |     |      |      |      |      |      |      |      |      |      |      |      |                             |      |
| Doctor diagnosed                                                                                                                                                                                  | .   | .    | 4    | 2.8  | 7    | 3.2  | 75   | 7.4  | .    | .    | 11   | 30.6 | .                           | .    |
| Test result <sup>ii</sup>                                                                                                                                                                         | .   | .    | 3    | 2.1  | 28   | 12.6 | 43   | 4.3  | 1    | 6.2  | .    | .    | 1                           | 2.5  |
| Respiratory:                                                                                                                                                                                      |     |      |      |      |      |      |      |      |      |      |      |      |                             |      |
| Doctor diagnosed                                                                                                                                                                                  | .   | .    | 1    | 0.7  | 2    | 0.9  | 3    | 0.3  | .    | .    | .    | .    | .                           | .    |
| Test result <sup>ii</sup>                                                                                                                                                                         | 2   | 11.8 | 7    | 4.8  | 2    | 0.9  | 12   | 1.2  | .    | .    | .    | .    | .                           | .    |
| Mortality (all-cause)                                                                                                                                                                             | .   | .    | .    | .    | 1    | 0.5  | 73   | 7.2  | .    | .    | 4    | 11.1 | .                           | .    |
| Other <sup>iii</sup>                                                                                                                                                                              | .   | .    | 45   | 31.0 | 52   | 23.4 | 137  | 13.6 | 3    | 18.8 | 1    | 2.8  | 11                          | 27.5 |

<sup>i</sup> Classification according to the World Bank Atlas Method, 2019 (31). LIC=low-income countries. LMIC=lower middle-income countries. UMIC=upper middle-income countries. HIC=high-income countries. AHIC=multiple study locations all high-income countries. SHIC=multiple study locations some high-income countries.

<sup>ii</sup> Refers to results from medical/diagnostic tests for a disease.

<sup>iii</sup> Miscellaneous outcomes with very low frequencies, e.g. musculoskeletal disorders, suicide, and diseases of the circulatory system.
