# Supplementary material for: Systematic review of methods used to assess exposure to pesticides in occupational epidemiology studies, 1993–2017
Source: PubMed Central journal article supplement — Occup Environ Med. 2020 Feb 25;77(6):357–67. doi: 10.1136/oemed-2019-105880 (PMC7279185; doi:10.1136/oemed-2019-105880), 2020-02-25
Supplement: oemed-2019-105880supp004.pdf [file oemed-2019-105880supp004.pdf]

**Supplementary File 4.** Relative frequencies of study designs according to study location extracted from articles on occupational pesticide exposures and various health outcomes.

| Study location <sup>i</sup>          | LIC |      | LMIC |      | UMIC |      | HIC  |      | SHIC |      | AHIC |      | Study location not reported |      |
|--------------------------------------|-----|------|------|------|------|------|------|------|------|------|------|------|-----------------------------|------|
|                                      | n   | %    | n    | %    | n    | %    | n    | %    | n    | %    | n    | %    | n                           | %    |
| Number of articles                   | 16  | 1.3  | 134  | 10.5 | 204  | 16.1 | 841  | 66.2 | 13   | 1.0  | 30   | 2.4  | 33                          | 2.6  |
| Articles applying >1 EAM             | 1   | 6.3  | 11   | 8.2  | 19   | 9.4  | 159  | 18.9 | 1    | 7.6  | 5    | 16.7 | 7                           | 21.2 |
| Articles not reporting EAM           | 1   | 6.2  | 1    | 2.2  | 4    | 0.2  | 2    | 0.2  | 1    | 7.7  | .    | .    | .                           | .    |
| Number of EAM occurrences in studies | 17  | 1.1  | 145  | 9.8  | 222  | 15.0 | 1007 | 67.9 | 16   | 1.1  | 36   | 2.4  | 40                          | 2.7  |
| Cross-sectional                      | 16  | 94.1 | 86   | 59.3 | 123  | 55.4 | 210  | 20.9 | 6    | 37.5 | 4    | 11.1 | 21                          | 52.5 |
| Cohort (prospective)                 | 28  | 19.3 | 1    | 5.9  | 48   | 21.6 | 409  | 40.6 | 3    | 18.8 | 5    | 13.9 | 11                          | 27.5 |
| Cohort (retrospective)               | .   | .    | .    | .    | 2    | 0.9  | 17   | 1.7  | .    | .    | .    | .    | 1                           | 2.5  |
| Case-control                         | .   | .    | 28   | 19.3 | 46   | 20.7 | 337  | 33.5 | 7    | 43.8 | 24   | 66.7 | 5                           | 12.5 |
| Study design not reported            | .   | .    | 3    | 2.1  | 3    | 1.4  | 34   | 3.4  | .    | .    | 3    | 8.3  | 2                           | 0.5  |

<sup>i</sup> Classification according to the World Bank Atlas Method, 2019 (31). LIC=low-income countries. LMIC=lower middle-income countries. UMIC=upper middle-income countries. HIC=high-income countries. AHIC=multiple study locations all high-income countries. SHIC=multiple study locations some high-income countries.
